# Supplementary material
Source: MDPI journal article supplement (https://www.mdpi.com/2072-4292/13/16/3201)
Supplement: s1 [file s1]

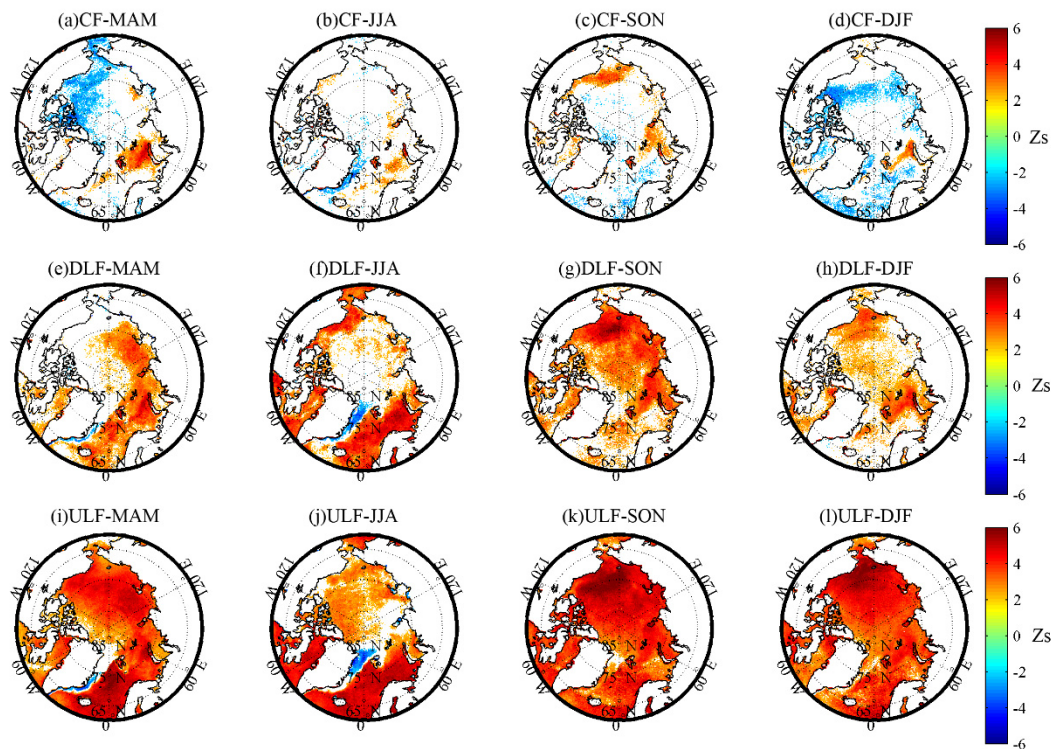

**Figure S1.** Spatial distributions of Zs derived by the Mann-Kendall test over the seas in Arctic (60°N~90°N) for different seasons from 1982 to 2019 at 14:00 LST. **(a–d)** CF in MAM, JJA, SON, and DJF. **(e–h)** DLF in MAM, JJA, SON, and DJF. **(i–l)** ULF in MAM, JJA, SON, and DJF. The colored regions are at a significance level of 95%.

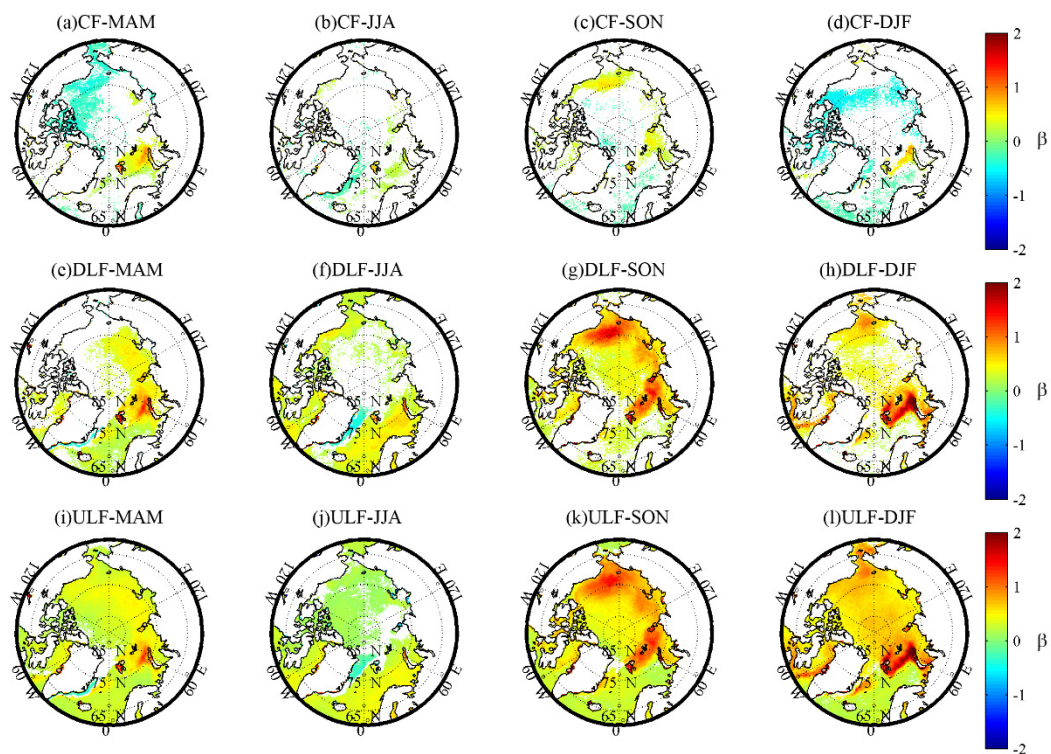

**Figure S2.** Spatial distributions of  $\beta$  derived by the Sen's slope test over the seas in Arctic ( $60^{\circ}\sim 90^{\circ}$  N) for different seasons from 1982 to 2019 at 14:00 LST. **(a–d)** CF in MAM, JJA, SON, and DJF. **(e–h)** DLF in MAM, JJA, SON, and DJF. **(i–l)** ULF in MAM, JJA, SON, and DJF. The colored regions are at a significance level of 95%.

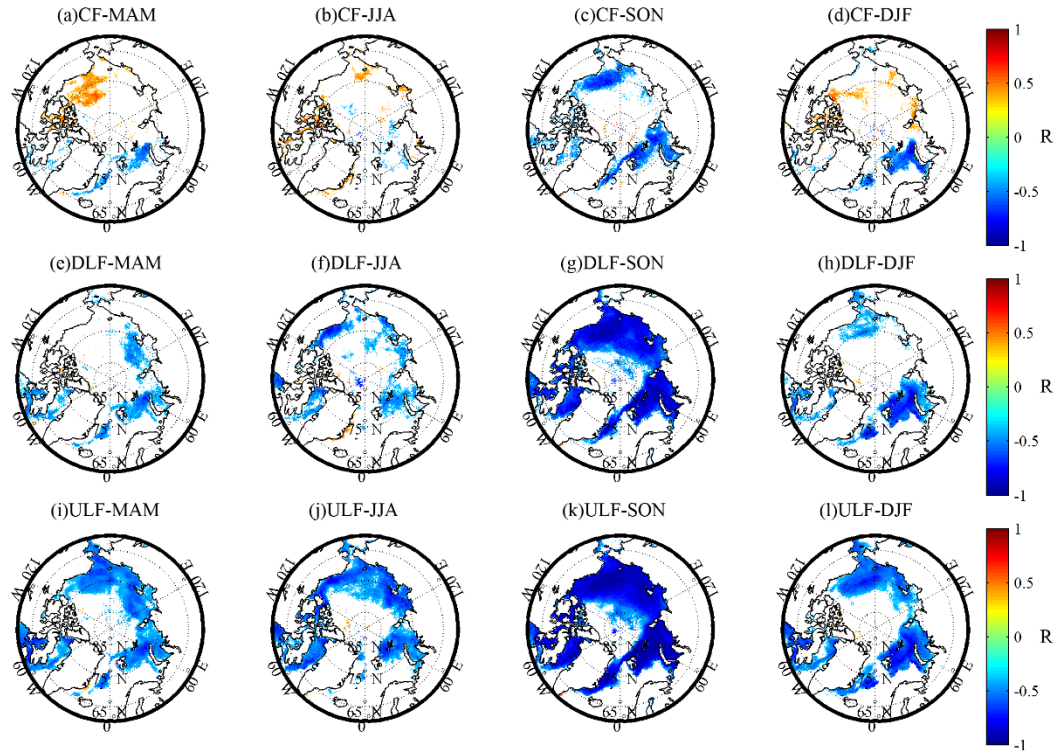

**Figure S3.** Seasonal distributions of Pearson's correlation coefficient  $R$  (with  $p < 0.05$ ) between the autumn SIC and (a–d) CF, (e–h) DLF, (i–l) ULF over the seas in Arctic ( $60^{\circ}\text{N}$ – $90^{\circ}\text{N}$ ) from 1987 to 2019 at 14:00 LST. (a,e,i) MAM; (b,f,j) JJA; (c,g,k) SON; (d,h,l) DJF.
